# Supplementary material for: White light powered antimicrobial nanoagents for triple photothermal, chemodynamic and photodynamic based sterilization
Source: Royal Society of Chemistry journal article supplement (doi:10.1039/d4nh00060a), 2024-01-01
Supplement: d4nh00060a1.pdf [file d4nh00060a1.pdf]

## Supplementary

### White Light Powered Antimicrobial Nanoagents for Triple Photothermal, Chemodynamic and Photodynamic Based Sterilization

*Hua Tian<sup>a,c,‡</sup>, Houjuan Zhu<sup>b,‡,\*</sup>, Yuling Xue<sup>a</sup>, Maonan Wang<sup>d</sup>, Kuoran Xing<sup>a</sup>, Zibiao Li<sup>b</sup>, Xian Jun Loh<sup>b</sup>, Enyi Ye<sup>b</sup>, Xianguang Ding<sup>e</sup>, Bang Lin Li<sup>f</sup>, Xueqiong Yin<sup>c,\*</sup>, David Tai Leong<sup>a,\*</sup>*

<sup>a</sup>Department of Chemical and Biomolecular Engineering, National University of Singapore, Singapore 117585, Singapore.

<sup>b</sup>Institute of Materials Research and Engineering (IMRE), Agency for Science, Technology and Research (A\*STAR), 2 Fusionopolis Way, Innovis #08-03, Singapore 138634, Republic of Singapore.

<sup>c</sup>Hainan Provincial Fine Chemical Engineering Research Centre, Hainan University, Haikou, Hainan, 570228, P.R. China.

<sup>d</sup>Department of Pathology, Xiangya Hospital, School of Basic Medical Sciences, Central South University, Changsha, China.

<sup>e</sup>Key Laboratory for Organic Electronics and Information Displays & Jiangsu Key Laboratory for Biosensors, Nanjing University of Posts & Telecommunications, Nanjing, 210023 China.

<sup>f</sup>School of Chemistry and Chemical Engineering, Southwest University, Chongqing 400715, P. R. China.

\*Corresponding author. E-mail: [cheltwd@nus.edu.sg](mailto:cheltwd@nus.edu.sg); [zhu\\_houjuan@imre.a-star.edu.sg](mailto:zhu_houjuan@imre.a-star.edu.sg); [yxq88@hotmail.com](mailto:yxq88@hotmail.com)

<sup>‡</sup>Equal contributions

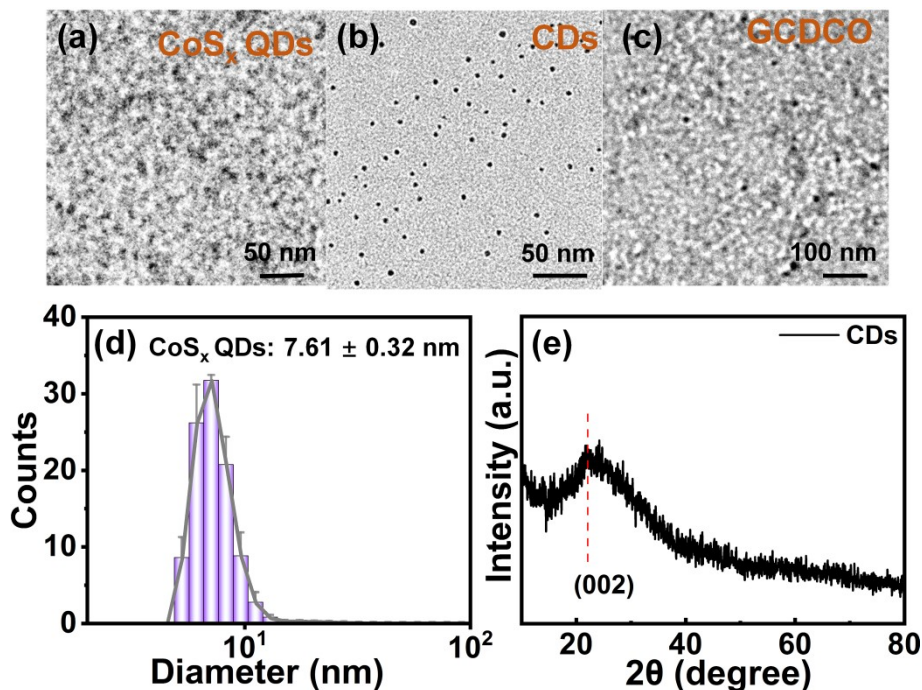

**Fig. S1** Nanodevice characterization. TEM images of (a) CoS<sub>x</sub> QDs, (b) CDs, (c) GCDCO, (d) Particle size of CoS<sub>x</sub> QDs, (e) XRD pattern of CDs.

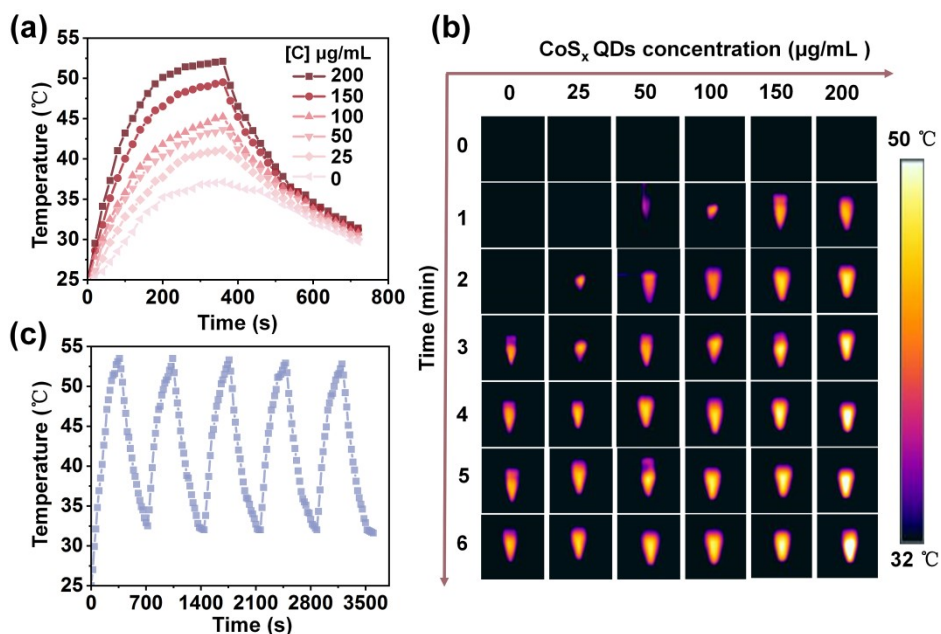

**Fig. S2** Photothermal evaluation of CoS<sub>x</sub> QDs irradiated by sunlight. (a) Photothermal heating curves of CoS<sub>x</sub> QDs solutions with various concentrations irradiated by simulated sunlight. (b) Infrared thermal images of CoS<sub>x</sub> QDs solutions at the indicated concentrations and irradiated for different durations. (c) Photothermal stability of CoS<sub>x</sub> QDs over 5 on/off cycles of simulated sunlight irradiation (200-2500 nm, 2335

W/cm<sup>2</sup>).

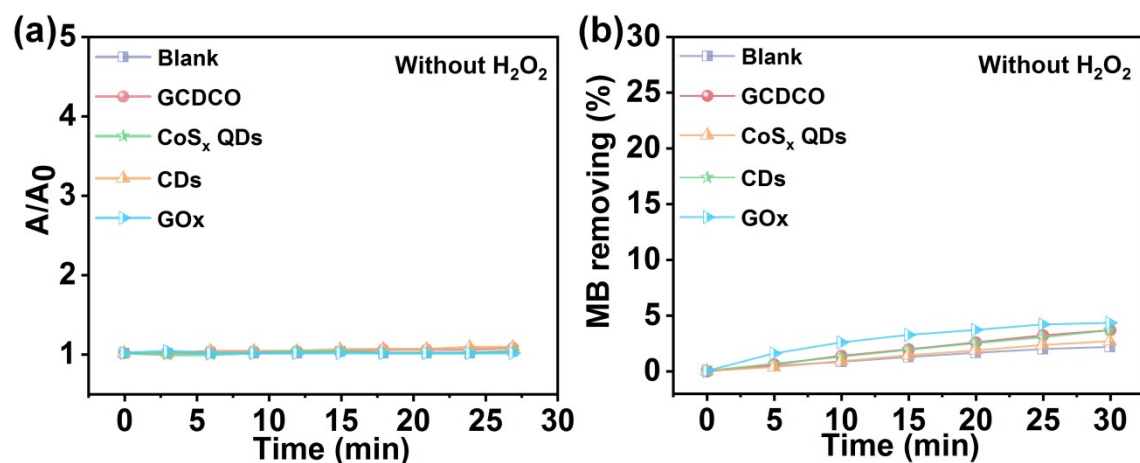

**Fig. S3** (a)  $A/A_0$  of different DAB reaction systems at different time without H<sub>2</sub>O<sub>2</sub>. (b) Degradation of MB of different reaction systems without H<sub>2</sub>O<sub>2</sub> at different time.

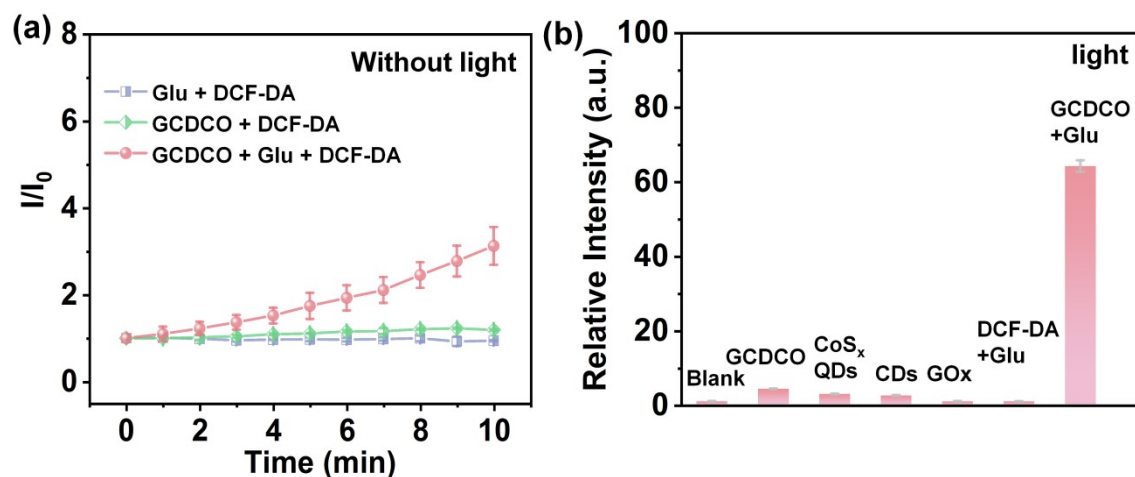

**Fig. S4** ROS production from GCDCO. (a) Time-dependent fluorescence changes without cold-light irradiation (400-800 nm, 91 mW/m<sup>2</sup>). (b) The relative intensity of different reaction systems with cold-light irradiation at 10 min.

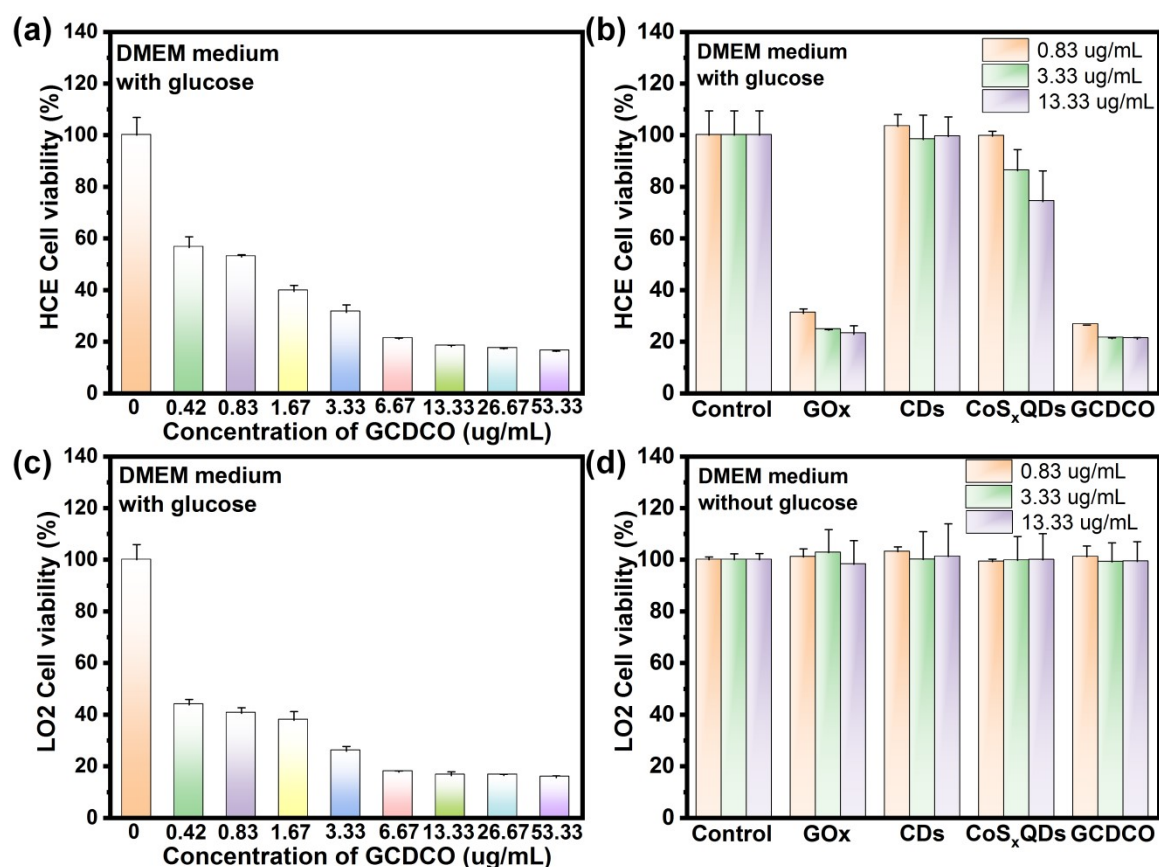

**Fig. S5.** Cell viability of HCE cells (a) and LO2 cells (c) incubated with various GCDCO at different concentration (0-53.33  $\mu\text{g/mL}$ ) for 6 h. (b) Cell viability of HCE cells treated with GOx, CDs, CoS<sub>x</sub> QDs and GCDCO at concentrations of 0.83, 3.33 and 13.33  $\mu\text{g/mL}$ . (d) Cell viability of LO2 cells treated with GOx, CDs, CoS<sub>x</sub> QDs and GCDCO at concentrations of 0.83, 3.33 and 13.33  $\mu\text{g/mL}$  in absence of glucose.

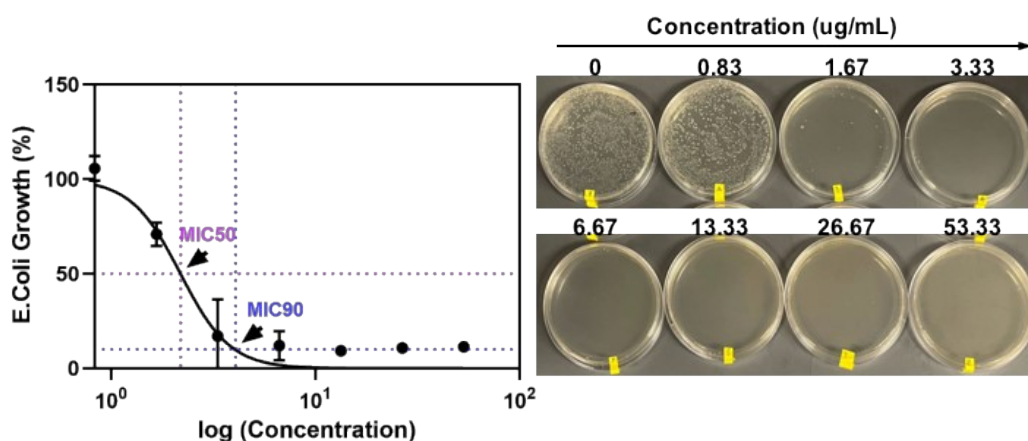

**Fig. S6.** Minimum inhibitory concentration (MIC) for different concentrations of GCDCO nanoagents for 12 h.

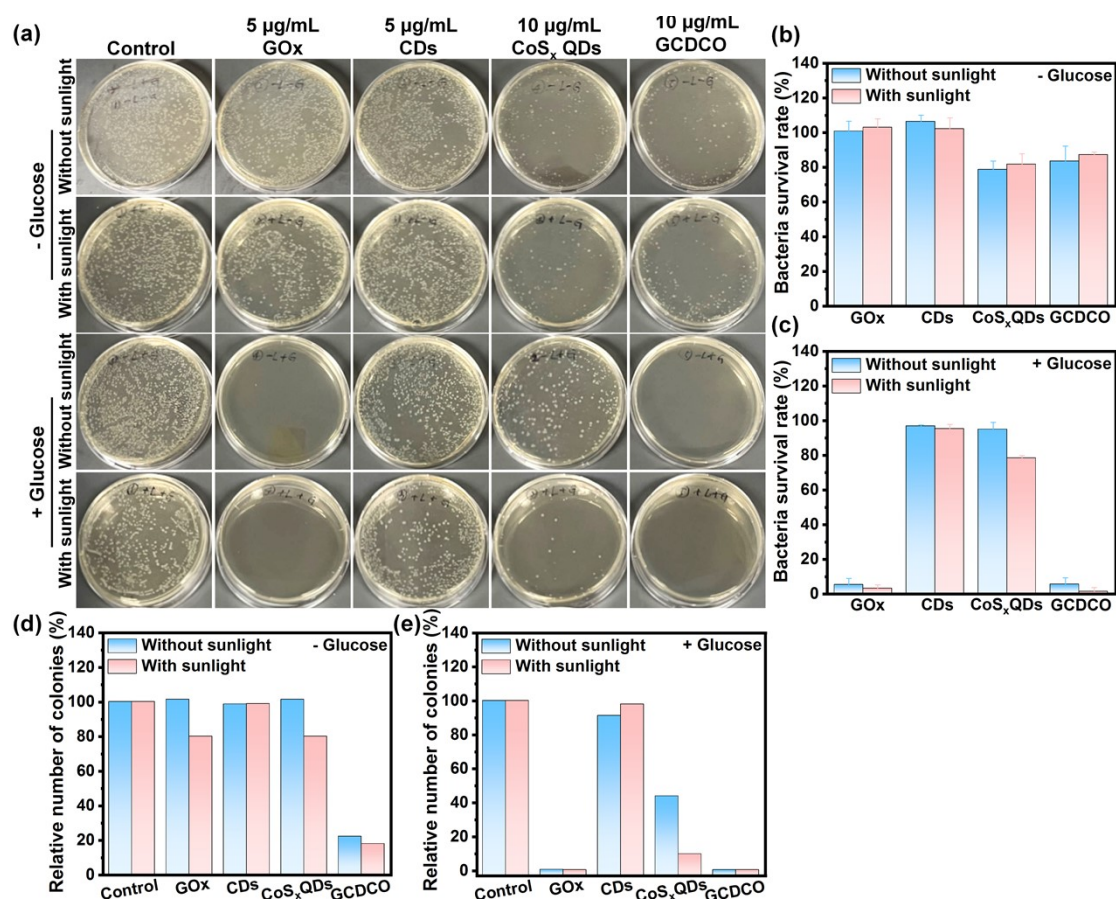

**Fig. S7.** Antibacterial characterization of *E. coli* *in vitro*. (a) Photographs of survived bacterial colonies of *E. coli* without sunlight and with sunlight treatment in the absence and presence of glucose. Corresponding antibacterial activity of GOx (5  $\mu\text{g/mL}$ ), CDs (5  $\mu\text{g/mL}$ ), CoS<sub>x</sub> QDs (10  $\mu\text{g/mL}$ ) and GCDCO (10  $\mu\text{g/mL}$ ) without sunlight and with sunlight treatment in the absence (b) and presence of glucose (c) measured by OD values of bacteria dispersion. Corresponding antibacterial activity of GOx, CDs, CoS<sub>x</sub> QDs and GCDCO without sunlight and with sunlight treatment in the absence (d) and presence of glucose (e) measured by bacteria counting.

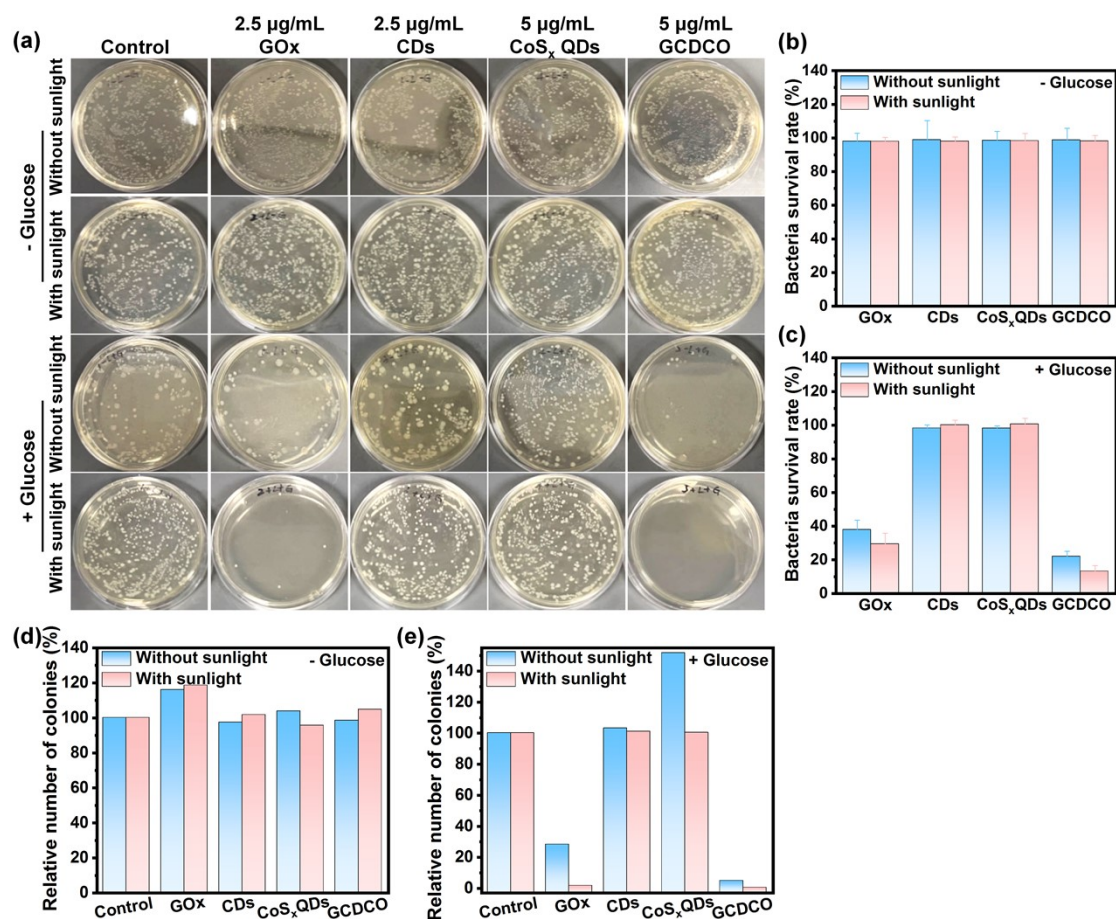

**Fig. S8.** Antibacterial characterization of *E. coli* in vitro. (a) Photographs of survived bacterial colonies of *E. coli* without sunlight and with sunlight treatment in the absence and presence of glucose. Corresponding antibacterial activity of GOx (2.5  $\mu\text{g/mL}$ ), CDs (2.5  $\mu\text{g/mL}$ ), CoS<sub>x</sub> QDs (5  $\mu\text{g/mL}$ ) and GCDCO (5  $\mu\text{g/mL}$ ) without sunlight and with sunlight treatment in the absence (b) and presence of glucose (c) measured by OD values of bacteria dispersion. Corresponding antibacterial activity of GOx, CDs, CoS<sub>x</sub> QDs and GCDCO without sunlight and with sunlight treatment in the absence (d) and presence of glucose (e) measured by bacteria counting.

**Table S1 Elemental analysis**

| Sample               | Atomic conc. (%) |       |
|----------------------|------------------|-------|
|                      | S 2p             | Co 2p |
| GCDCO                | 1.38             | 0.47  |
| CoS <sub>x</sub> QDs | 0.81             | 0.39  |
